# The epidemiology and genomics of a virulent emerging fungal pathogen in an Australian reptile

B. Class<sup>1</sup>, D. Powell<sup>1</sup>, J. Terraube<sup>1</sup>, G. Albery<sup>2</sup>, C. Delmé<sup>1</sup>, S. Bansal<sup>2</sup>, C.H. Frère<sup>1,3\*</sup>

<sup>1</sup>Global Change Ecology Research Group, University of the Sunshine Coast; Sippy Downs, QLD, Australia.

<sup>2</sup>Department of Biology, Georgetown University; Washington DC, United States.

<sup>3</sup>School of Biological Sciences, University of Queensland, St Lucia, QLD, Australia

\*Corresponding author. Email: [c.frere@uq.edu.au](mailto:c.frere@uq.edu.au)

## Abstract

Emerging infectious fungal diseases (EIFDs) represent a major conservation concern worldwide. Here, we provide early insights into the potential threat that *Nannizziopsis barbatae* (*Nb*), a novel EIFD, poses to Australian herpetological biodiversity. First known to the reptile pet trade as a primary pathogen causing untreatable severe dermatomycosis, since 2013, *Nb* has emerged in a growing number of phylogenetically and ecologically distant free-living reptiles across Australia. Observing its emergence in a long-term study population of wild eastern water dragons (*Intellagama lesueurii*), we demonstrate the pathogen's virulence-related genomic features, within-population spatiotemporal spread, and survival costs, all of which imply that *Nb* could pose a threat to Australian reptiles in the future. Our findings highlight the need to closely monitor this pathogen in Australian ecosystems.

## 1 **Introduction**

2 Emerging infectious fungal diseases (EIFDs) pose a serious threat to the conservation of global  
3 biodiversity (1–3) and are responsible for some of the most severe mass mortality events in wild  
4 populations (1–4). Notable examples include chytridiomycosis, which has now impacted over 500  
5 species of amphibians in 54 countries, driving the extinction of 90 species worldwide (5); white-  
6 nose syndrome, which has resulted in a devastating 75% population decline across bats in Canada  
7 and the USA (6, 7); and the more recent snake fungal disease (8), which poses a significant threat  
8 to snake populations in eastern North America (9). Whilst EIFDs make up less than three percent  
9 of infectious agents reported amongst animal hosts, they are nonetheless responsible for over 70  
10 % of disease-driven population declines and extinctions (1).

11 Members of the fungal genus *Nannizziopsis* are well known to the pet trade as primary pathogens  
12 that cause serious cutaneous and systemic fatal disease in a diverse range of reptiles across the  
13 world (10–13). *Nannizziopsis barbatae* was first identified in captivity in 2009 (14), and remained  
14 confined to captivity until, in 2013, two-free living eastern water dragons (*Intellagama lesueurii*)  
15 from locations separated by 30 km across Brisbane (Queensland, Australia) were identified with  
16 proliferative dermatitis, necrosis, ulceration and emaciation (15). *Nb* has since emerged in a  
17 growing number of phylogenetically and ecologically distant free-living lizards (2 x agamid  
18 species and 2 x skink species) across Australia (6 sites in Qld, 1 site in NSW and 1 site in WA)  
19 (15) and is known to cause disease in 9 species (data combined from captive and wild cases, see  
20 Table S1). This recent emergence in the wild, followed by a rapid expansion of its geographical  
21 distribution and host range, indicate that this fungal pathogen may present a pressing new threat  
22 to Australia’s herpetological biodiversity. While we know that *Nb* causes untreatable severe  
23 dermatomycosis (15), mitigating its impact will require a thorough understanding of its ecology.

24 Taking advantage of its recent emergence in a long-term study population of eastern water dragons  
25 (15) and using an innovative combination of comparative genomics and spatiotemporal  
26 autocorrelation models, we assess the potential threat that *Nb* may pose to Australia's  
27 herpetological biodiversity.

## 28 **Results**

29 *Nb* emerged in 2013 in two geographically isolated populations of eastern water dragons in the  
30 city of Brisbane (QLD, Australia). One of these populations (Roma Street Parkland, 27°27'46'S,  
31 153°1'11'E) has been monitored with frequent behavioral surveys and yearly catching since 2010.  
32 This population comprises 336 individuals on average and behavioral surveys were performed 2-  
33 3 times per week along a transect which covered 85% of this population (16). During behavioral  
34 surveys, individuals' GPS position were systematically recorded and profile photographs taken to  
35 allow later identification based on unique scale patterns (17). Disease diagnosis was based on the  
36 presence or absence of characteristic skin lesions (15), which observers were trained to recognize  
37 from season 9 (2018-2019) onwards. Individuals' disease status for earlier years was hence  
38 determined retrospectively using photos from catching and, when not available, behavioral  
39 surveys. Once diagnosed, individuals were assumed to remain diseased even when not caught  
40 again. Amongst the diseased individuals repeatedly captured between February 2020 and August  
41 2021, some individuals (20/61) showed a reduction in the severity of their lesions, although this  
42 reduction was mainly observed in individuals exhibiting mild lesions (15/20, Data S1). Using this  
43 decade-long individual-based data, we found that the disease prevalence has continuously  
44 increased throughout the population since *Nb*'s emergence. Starting with one individual in 2013,  
45 a total of 158 individuals have now presented with clinical signs of the disease (n =1221 for field  
46 seasons 3-11) and in the last field season (2020-2021), the prevalence was 26.4% (95% CI: 24.2-  
47 28.4, Fig. S1, Table S2). The majority (96.7%) of these individuals were adults, and males

48 (58.3%). Only five juveniles were found with clinical signs of the disease (0.07 to 5.5% of  
49 juveniles) between late 2018 to early 2021, despite juveniles representing on average 17.8% of  
50 observed individuals during these years.

### 51 *N. barbatae* shares genomic characteristics with other fungal pathogens

52 *Nb* is a member of the Onygenales, an order of fungi that are able to degrade keratin, the main  
53 component of the vertebrate outer skin layer. Some members of this order are important primary  
54 pathogens of animals and humans and recent comparative genomic studies have helped resolve  
55 differences in gene content between pathogenic and non-pathogenic species (18). With this in  
56 mind, we performed a comparative whole-genome analysis incorporating the full set of genes of  
57 *Nb* (8,012 predicted protein-coding sequences) together with 16 other species of fungi (Table 1)  
58 to uncover genomic features likely to contribute to *Nb*'s pathogenicity.

59 First, we identified that the *Nb* genome contains a gene repertoire rich in proteases, known to  
60 increase fungal virulence (19), and shares similarities with other pathogenic Onygenaceae (Fig.  
61 1A). Most notable is an expansion of trypsin domain-containing genes (PF00089) (Fig. 1B) found  
62 only in *Nb* (7 genes) and the fungus causing snake fungal disease, *O. ophidiicola* (29 genes). Both  
63 of these species are capable of primary infection in reptiles (9, 20) suggesting a role for this gene  
64 family in influencing host range. *Nb* has a degradome that bears resemblance to important  
65 dermatophytes and the enrichment of proteases including, subtilase (PF00082) and deuterolysin  
66 (PF02102), suggest extensive proteolytic capacity. Second, *Nb* has a large number of protein  
67 kinase domain-containing genes (PF00069) which may contribute to its capacity to infect a broad  
68 range of reptile taxa (15). Last, we identified a higher number of LysM domain-containing genes  
69 (PF01476) in the *Nb* genome than most of the other fungi in this analysis. Together, these

70 characteristics of the *Nb* genome highlight factors which may be key to determining its propensity  
71 to infect herpetofauna.

### 72 *N. barbatae* infection is spatially structured within the population

73 To investigate the phenotypic and spatiotemporal predictors of fungal infection, we constructed  
74 spatiotemporal autocorrelation models using the Integrated Nested Laplace Algorithm.  
75 Comparison of disease prevalence models (Fig. S2) provided strong support for spatial structuring  
76 ( $\Delta\text{DIC}=-117.24$  relative to the base model), but relatively little evidence for spatiotemporal  
77 structuring ( $\Delta\text{DIC}=-4.11$  relative to the spatial model) (Fig. S2). That is, disease prevalence varied  
78 more spatially (assuming no time effect) than spatiotemporally. Indeed, spatial effects were  
79 strongly correlated across field seasons ( $\rho>0.9$ ) and disease prevalence has remained  
80 consistently higher in the East (up to 33%) compared to the West (<10%, Fig. 2). Models also  
81 showed lower prevalence in juveniles than adults, and in females compared to males (Fig. S2).

### 82 *N. barbatae* infection is associated with survival costs

83 To investigate the survival costs of infection, we fitted a binomial survival model, where survival  
84 of an individual was coded based on whether they were observed in any subsequent year. The full  
85 population model showed effects of cohort, field season and sex on the yearly probability of  
86 survival but failed to detect any effect of the disease (Fig. 3A). In contrast, randomly subsampling  
87 diseased and non-diseased individuals from matching cohorts and accounting for age (number of  
88 days in the population), sex, and field season in subsequent models revealed a small but significant  
89 individual survival costs of the disease (Fig. 3B-D). All subsampled models found a significant  
90 effect of the disease (Fig. 3B); the overall mean survival cost was 12% (Fig. 3C), so that the mean  
91 predicted annual survival of diseased individuals was 74% compared to 86% for non-diseased

92 individuals (Fig. 3D). Controlling for spatial autocorrelation did not improve model fit ( $\Delta\text{DIC} > -2$   
93 relative to the base model), demonstrating that this survival cost did not vary spatially.

## 94 **Discussion**

95 Gaining early insights into disease virulence, spatiotemporal spread, and survival costs is  
96 particularly urgent in the case of novel emerging infections that have the potential to severely  
97 threaten biodiversity. Yet such data are challenging to obtain in the wild, greatly impeding our  
98 abilities to predict and mitigate the impact of infections on wildlife. Our study investigates within-  
99 population spread and impacts of *Nannizziopsis barbatae*, a novel emerging infectious fungal  
100 disease which should give us cause for vigilance.

### 101 ***Genomic signatures of pathogenicity***

102 We show that the free-living *Nb* genome sampled from our long-term study population of eastern  
103 water dragon contains many gene families implicated in fungal pathogenicity, including several  
104 proteases, protein kinases, and LysM effector proteins. Virulence in wildlife fungal pathogens has  
105 often been associated with expansions of protease gene repertoires and their expression (e.g.  
106 chytrid (21); WNS (22–24)). *Nb* has a gene repertoire rich in proteases with features similar to  
107 those identified in other wildlife fungal pathogens such as snake fungal disease (e.g. trypsin  
108 domain-containing genes) and chytrid fungus (e.g. M36 metalloproteases). Additionally, a  
109 comprehensive and novel repertoire of protein kinases can provide fungal species with plasticity  
110 in occupying different ecological niches and responding to environmental change (25, 26). LysM  
111 effector proteins may contribute to fungal virulence by suppressing the host immune system  
112 response via interactions with chitin (27). Comparative studies strongly suggest an association  
113 with the enrichment of LysM domain-containing genes and virulence in the keratin-degrading  
114 dermatophytes (26). Furthermore, chitin-binding CBM18 gene family proteins (PF00187) are also

115 found expanded in *B. dendrobatidis*, and are thought to play a role in evasion of the amphibian  
116 host immune response (26). While understanding the molecular mechanisms of this pathogen is  
117 central to mitigating its impact on wildlife, the exact source of *Nb*, its current free-living genetic  
118 diversity, and its mode of introduction into our dragon population remain unknown. Genomic  
119 resources for *Nannizziopsis* spp. will enable the development of tools to answer these questions.  
120 The emergence of this disease urgently necessitates the identification of its origin to better  
121 understand and thus predict the impact it will likely have on the Australian herpetofauna. For  
122 instance, it is critical that we determine whether or not we are dealing with a novel pathogen and  
123 thus naïve hosts, or whether the population has had historical exposure to the pathogen.

#### 124 ***Within-population spread***

125 Even though central to the forecasting and control of wildlife disease management, quantifying  
126 the contribution of different transmission pathways of a pathogen is notoriously challenging to  
127 achieve in nature (28). Using an intensively-studied lizard population, we provide a much-needed  
128 early assessment of *Nb*'s spatiotemporal spread since its emergence in 2013. We show that the  
129 disease has spread relatively rapidly across an increasing portion of the population, providing the  
130 first likely evidence for within-population *Nb* transmission in the wild. From a single individual  
131 dragon identified with *Nb*-like clinical signs in 2013, more than 150 individuals have displayed  
132 apparent clinical signs of *Nb* and the disease prevalence has reached 26.4% of the population.  
133 Worryingly, prevalence of the disease has been continuously increasing since 2016 and shows no  
134 signs of slowing down. Although it is unclear what the transmission route of this pathogen is in  
135 this population (e.g. physical contact or environmental latency), our results show that over the  
136 years, the disease prevalence has remained higher in the eastern part of the park than in the western  
137 area, which could be due to spatial variation in environmental factors influencing the pathogen's

138 survival, transmission, or virulence (29). Analyses of the dragons' spatial and social behaviors  
139 coupled with molecular diagnostics capabilities will help identify transmission routes, predict  
140 geographic spread of the pathogen, and inform potential future interventions (30).

#### 141 ***Low but detectable survival costs***

142 Survival costs of *Nb* infection were detectable at an individual level. Although individuals showing  
143 clinical signs of the disease varied in their survival costs, they were still relatively likely to survive  
144 from one year to the next (>70% chance), demonstrating that adults are relatively tolerant to the  
145 pathogen and can carry it for multiple years once skin lesions become apparent. Although the  
146 disease has been shown to be incurable in captive reptiles (15), some rare individuals in this  
147 population showed reductions in the severity of their lesions (Data S1) and we are yet to determine  
148 whether individual diseased dragons can entirely clear the infection (as shown in chytridiomycosis  
149 (31) and white-nose syndrome (32)). Additionally, we were only able to detect survival costs when  
150 we subsampled our dataset to cohort-matched (age and sex) diseased and non-diseased individuals,  
151 thereby reducing extraneous variation in survival probability. Evidence for individual survival  
152 costs remains similarly equivocal for other EIFDs, some of which have been studied for much  
153 longer than *Nb* (31–33). We also acknowledge some uncertainty in our estimates of survival costs  
154 due to potential errors in diagnosis, our visual assessment being particularly prone to miss  
155 asymptomatic or cryptic infections in the population. Additionally, because lesions are easier to  
156 observe in caught individuals, this underestimation may be particularly severe for individuals or  
157 classes of individuals that were less likely to be caught (e.g. juveniles). Taken together, these facts  
158 imply a general difficulty detecting survival costs of fungal pathogens in long-lived reptiles.

159 Despite identifying individual-level costs of infection, predicting *Nb*'s impacts on population  
160 dynamics remains difficult. Such uncertainty is likewise common to other EIFDs, as some



161 populations affected by chytridiomycosis and white nose syndrome have not declined  
162 systematically (44, 45). Predicting *Nb*'s impacts on the viability of our studied population of  
163 eastern water dragons will require key information about: i) *Nb*'s prevalence and survival costs at  
164 different life stages (36, 37), which should be achieved with higher certainty through the use of  
165 molecular diagnosis; ii) *Nb*'s potential reproduction costs, as was documented for snake fungal  
166 disease (38) and chytridiomycosis (39); iii) the mechanisms underlying *Nb*'s spatiotemporal  
167 spread. In addition, assessing whether the pathogen's transmission dynamics are density-  
168 dependent might be crucial to understanding whether the epidemic will become self-limiting (40).

### 169 ***A novel threat for the Australian biodiversity?***

170 EIFDs constitute an increasing cause for concern regarding global health, food security and  
171 biodiversity conservation (1). With *Nb*, we may be witnessing the early days of a novel fungal  
172 threat to Australian herpetological biodiversity. While other infamous EIFDs with global impacts  
173 on wild animal populations were only reported after mass mortality events had already occurred  
174 (41, 42), we have the unique opportunity to monitor the emergence of this pathogen and take action  
175 early enough to limit its spread. Although the origin and long-term population impacts of *Nb*  
176 remain unknown, its genomic similarity with other pathogenic EIFDs, capacity to spread in the  
177 wild, and detectable survival costs, combined with its repeated emergence across the country and  
178 broad host range, highlight the critical need to closely monitor this pathogen in Australian  
179 ecosystems.

180

## 181 **Materials and Methods**

### 182 *Study system*

183 The population of Eastern water dragons has been monitored since 2010, with frequent  
184 behavioral surveys and regular catching during the active season, (i.e. early September to late  
185 April). During behavioral surveys (2-3 times per week), individuals' behavior and GPS position  
186 were recorded and photographs taken to allow later identification based on unique scale patterns  
187 (see (17)). Individuals were also caught during 1-2 weeks catching events in the years 2013, 2014,  
188 and yearly since 2016. Morphometric measurements, head and body photographs and DNA  
189 samples (blood or tip of the tail) were taken, and unique PIT-tags were inserted in their right upper  
190 hind leg. EWD are sexually dimorphic, males being overall larger than females, with more  
191 developed jaw and dorsal crest and a red ventral coloration (43). Age class (adult vs. juvenile) was  
192 determined for each breeding season using a combination of approaches (snout-vent length when  
193 individuals were caught; general appearance when individuals were not caught) and taking into  
194 account individuals' observation history (individuals being considered adults after 3 years (43)).  
195 Disease diagnosis was based on the presence or absence of characteristic skin lesions (15), which  
196 observers were trained to recognize from season 9 (2018-2019) onwards. Individuals' disease  
197 status before season 9 was hence determined retrospectively using pictures from behavioral  
198 surveys and catching (75-100% for the latter). From season 9 onwards, disease status was assessed  
199 directly in the field during behavioral surveys and catching (65-92% for the latter). From February  
200 2020 onwards, disease severity was rated for captured individuals using scores ranging from 0 (no  
201 lesions, not diseased) to 5 (severely diseased, Table S3).

202

## 203 *Genome annotation and comparative analysis*

204       The genomes of *N. barbatae*, *O. ophidiicola* and *C. queenslandicum* were annotated using  
205 the Funannotate (v1.7.4) gene prediction pipeline (<https://funannotate.readthedocs.io/>). Genomes  
206 were firstly screened for repeats using custom generated databases for each species using  
207 RepeatModeler (v2.0.1) and masked using RepeatMasker (v4.1.0; <http://www.repeatmasker.org>).  
208 Repeat masked assemblies were then cleaned and sorted before initial gene prediction using  
209 GeneMark-ES (v4.65) (44). Protein sequences from high-quality fungal genomes used in this study  
210 were used for protein-to-genome alignments as evidence for gene predictors AUGUSTUS (45),  
211 SNAP(46), and Glimmer (47) before being passed to EVM (48) to build consensus gene structures.  
212 All other predicted protein sequences were downloaded directly from GenBank (Table 1). The  
213 newly annotated gene models were evaluated for completeness using BUSCO (v5) (49) in protein  
214 mode against the ascomycota\_odb10 database (Table S4).

215       Gene families within each fungal genome were identified from searches of the protein-coding  
216 sequences for Pfam (50) domains to assign gene function. We used HMMER (v3.1) (51)  
217 (hmmScan) to search the Pfam A database (release 32.0) for 4312 different domains of 16 different  
218 species of fungi. To test for significantly expanded gene families, a Fisher's exact test was then  
219 conducted iteratively using R (52), comparing the number of counts in Pfam families found in an  
220 individual genome, normalised by the total gene count for that species, against the background,  
221 which we defined as the average of the counts in the remaining species. Multiple testing corrections  
222 were done using the FDR method in R for all calculated *p*-values. A Pfam domain was considered  
223 expanded if it showed a corrected *p*-value < 0.05. Counts of each domain were collated for each  
224 species with domains that occurred multiple times in a protein sequence being counted only once.  
225 Heatmap was generated using the package pheatmap with data normalised using the scale function  
226 in R. Protein sequences were aligned using Muscle (v3.8.425) (53) and phylogenetic inference

227 made using FastTree (v2.1.12) (54) built in to the commercially available Geneious Prime  
228 (v2021.1.1) software.

### 229 *Drivers and spatiotemporal dynamics of infection*

230 To investigate the phenotypic and spatiotemporal predictors of fungal infection, we  
231 constructed spatiotemporal autocorrelation models using the Integrated Nested Laplace Algorithm,  
232 implemented in the `inla` package in R (55). These models fitted binary fungal infection as a  
233 response variable, where an individual was coded as a 1 if it had previously been diagnosed with  
234 fungal infection, and a 0 otherwise. All covariates were categorical, and included Age class (3  
235 levels: Adult, Juvenile, and Unknown); Sex (2 levels: Female and Male); Field season (9 levels:  
236 one for each sampling year 2012-2021). The model used a binomial logit error distribution:

237 Fungus (0/1) ~ Season + Sex + Age

238 We first fitted these fixed effects as a “Base” model. To investigate spatiotemporal patterns  
239 of infection, we then added Stochastic Partial Differentiation Equation (SPDE) random effects  
240 using individuals’ mean map locations in a given season (“annual centroids”). This random effect  
241 models two-dimensional patterns of the response variable based on distances between individuals  
242 using Matérn correlation (56, 57) The “Spatial” model used a static field, where the spatial  
243 distribution of infection was modelled to be unchanging across the study period; the  
244 “Spatiotemporal” model allowed this field to change from year to year, using an autoregression  
245 (AR1) correlation across years, to examine how the infection’s distribution changed over the  
246 course of the study period. We compared these three models using deviance information criterion  
247 (DIC) as a measure of model fit to investigate whether spatiotemporal correlation significantly  
248 improved the model.

249

250 *Survival costs*

251 To investigate the survival costs of infection, we fitted a binomial survival model, where  
252 survival was coded based on whether the individual was seen in a subsequent year (we hence  
253 excluded the most recent year, 2019). The model was specified as follows:

254  $\text{Survived (0/1)} \sim \text{Season} + \text{Sex} + \text{Cohort} + \text{ActiveFungus}$

255 Following this model, we used a subsampling routine that allowed us to reduce extraneous  
256 variation in survival by compensating for the low proportion of infected individuals in the study  
257 period (120/1151=10.4%) and for the unknown age of infected individuals. We 1) assigned each  
258 individual a cohort based on the first season that they were observed in the population; 2) selected  
259 the 101 individuals that were ever observed with an infection between 2012 and 2018; and 3) age  
260 matched each diseased individual with a random non-diseased individual from their cohort.  
261 Between 2018 and 2020, six diseased individuals that were caught in a very poor condition were  
262 euthanized. These individuals were hence excluded from these analyses. Having subsampled the  
263 population, we then ran the same model as before. This protocol was repeated 1000 times to ensure  
264 an even and different selection of non-diseased individuals and survival effect estimates.

265 We summarized the findings from these models by predicting survival probability for each  
266 individual and comparing these values between uninfected and infected individuals. To produce  
267 conservative estimates, we randomly drew one effect estimate from each model's fungal effect  
268 estimate posterior distribution and used these estimates to predict the survival probability for all  
269 infected and uninfected individuals. We then took the mean survival probability for these groups  
270 of individuals and subtracted the infected individuals' survival probability from those of the  
271 uninfected individuals to estimate a survival cost of infection.

272 **Acknowledgments:** We acknowledge the Turrbal and Yugara people, as the First Nations owners  
273 of the lands where our study site sits. We pay respect to their Elders, lores, customs and creation  
274 spirits. In addition, we would like to thank the students and volunteers that have contributed to the  
275 data collection as well as the staff and management of Roma Street Parkland for their ongoing  
276 support.

277 **Funding:**

278 Australian Research Council, grant FT200100192 (CF)

279 **Author contributions:**

280 Conceptualization: BC, JT, CF, DP, GA, SB

281 Data curation: BC, CD, CF

282 Methodology: GA, DP, BC

283 Investigation: BC, DP, JT, CF, CD

284 Visualization: DP, GA

285 Funding acquisition: CF

286 Project administration: CF

287 Supervision: CF, SB

288 Writing – original draft: BC, JT, CF

289 Writing – review & editing: BC, JT, CF, DP, GA, SB, CD

290 **Competing interests:** Authors declare that they have no competing interests.

291 **Data and materials availability:** Genome annotation data, individual data and R code used for  
292 statistical analyses are available from Figshare using the following link  
293 <https://doi.org/10.6084/m9.figshare.16599245> .

294 **Supplementary Materials**

295 Figs. S1 to S2

296 Table S1 to S4

297 Data S1

## 298 References

- 299 1. M. C. Fisher, Daniel. A. Henk, C. J. Briggs, J. S. Brownstein, L. C. Madoff, S. L. McCraw, S. J.  
300 Gurr, Emerging fungal threats to animal, plant and ecosystem health. *Nature*. **484**, 186–194 (2012).
- 301 2. M. C. Fisher, N. A. R. Gow, S. J. Gurr, Tackling emerging fungal threats to animal health, food  
302 security and ecosystem resilience. *Phil. Trans. R. Soc. B*. **371**, 20160332 (2016).
- 303 3. F. Almeida, M. L. Rodrigues, C. Coelho, The still underestimated problem of fungal diseases  
304 worldwide. *Front. Microbiol.* **10** (2019), doi:10.3389/fmicb.2019.00214.
- 305 4. D. S. Bower, K. R. Lips, L. Schwarzkopf, A. Georges, S. Clulow, Amphibians on the brink.  
306 *Science*. **357**, 454–455 (2017).
- 307 5. M. C. Fisher, T. W. J. Garner, Chytrid fungi and global amphibian declines. *Nature Reviews*  
308 *Microbiology*. **18**, 332–343 (2020).
- 309 6. D. S. Blehert, A. C. Hicks, M. Behr, C. U. Meteyer, B. M. Berlowski-Zier, E. L. Buckles, J. T. H.  
310 Coleman, S. R. Darling, A. Gargas, R. Niver, J. C. Okoniewski, R. J. Rudd, W. B. Stone, Bat white-nose  
311 syndrome: an emerging fungal pathogen? *Science*. **323**, 227–227 (2009).
- 312 7. W. F. Frick, J. F. Pollock, A. C. Hicks, K. E. Langwig, D. S. Reynolds, G. G. Turner, C. M.  
313 Butchkoski, T. H. Kunz, An emerging disease causes regional population collapse of a common North  
314 American bat species. *Science*. **329**, 679–682 (2010).
- 315 8. J. M. Lorch, S. Knowles, J. S. Lankton, K. Michell, J. L. Edwards, J. M. Kapfer, R. A. Staffen, E.  
316 R. Wild, K. Z. Schmidt, A. E. Ballmann, D. Blodgett, T. M. Farrell, B. M. Glorioso, L. A. Last, S. J. Price,  
317 K. L. Schuler, C. E. Smith, J. F. X. Wellehan, D. S. Blehert, Snake fungal disease: an emerging threat to  
318 wild snakes. *Phil. Trans. R. Soc. B*. **371**, 20150457 (2016).
- 319 9. F. T. Burbrink, J. M. Lorch, K. R. Lips, Host susceptibility to snake fungal disease is highly  
320 dispersed across phylogenetic and functional trait space. *Science Advances*. **3**, e1701387 (2017).
- 321 10. A. D. Thomas, L. Sigler, S. Peucker, J. H. Norton, A. Nielan, Chrysosporium anamorph of  
322 Nannizziopsis vriesii associated with fatal cutaneous mycoses in the salt-water crocodile (*Crocodylus*  
323 *porosus*). *Medical Mycology*. **40**, 143–151 (2002).
- 324 11. J. A. Paré, L. Sigler, An Overview of Reptile Fungal Pathogens in the Genera Nannizziopsis,  
325 Paranannizziopsis, and Ophidiomyces. *Journal of Herpetological Medicine and Surgery*. **26**, 46–53 (2016).
- 326 12. J. Schneider, T. Heydel, L. Klasen, M. Pees, W. Schrödl, V. Schmidt, Characterization of  
327 Nannizziopsis guarroi with genomic and proteomic analysis in three lizard species. *Medical Mycology*. **56**,  
328 610–620 (2018).
- 329 13. A. G. Hill, J. R. Sandy, A. Begg, Mycotic dermatitis in juvenile freshwater crocodiles (*Crocodylus*  
330 *johnstoni*) caused by Nannizziopsis crocodili. *zamd*. **50**, 225–230 (2019).
- 331 14. L. Sigler, S. Hambleton, J. A. Paré, Molecular characterization of reptile pathogens currently  
332 known as members of the Chrysosporium anamorph of Nannizziopsis vriesii complex and relationship with  
333 some human-associated isolates. *Journal of Clinical Microbiology*. **51**, 3338–3357 (2013).
- 334 15. N. R. Peterson, K. Rose, S. Shaw, T. H. Hyndman, L. Sigler, D. İ. Kurtböke, J. Llinas, B. L.  
335 Littleford-Colquhoun, R. Cristescu, C. Frère, Cross-continental emergence of Nannizziopsis barbatae  
336 disease may threaten wild Australian lizards. *Sci Rep*. **10**, 20976 (2020).
- 337 16. K. Strickland, R. Gardiner, A. J. Schultz, C. H. Frère, The social life of eastern water dragons: sex  
338 differences, spatial overlap and genetic relatedness. *Animal Behaviour*. **97**, 53–61 (2014).
- 339 17. R. Z. Gardiner, E. Doran, K. Strickland, L. Carpenter-Bundhoo, C. Frère, A Face in the Crowd: A  
340 Non-Invasive and Cost Effective Photo-Identification Methodology to Understand the Fine Scale  
341 Movement of Eastern Water Dragons. *PLoS ONE*. **9**, e96992 (2014).
- 342 18. J. F. Muñoz, J. G. McEwen, O. K. Clay, C. A. Cuomo, Genome analysis reveals evolutionary  
343 mechanisms of adaptation in systemic dimorphic fungi. *Scientific Reports*. **8**, 4473 (2018).
- 344 19. I. Yike, Fungal proteases and their pathophysiological effects. *Mycopathologia*. **171**, 299–323  
345 (2011).
- 346 20. R. Johnson, C. Sangster, L. Sigler, S. Hambleton, J. Paré, Deep fungal dermatitis caused by the  
347 Chrysosporium anamorph of Nannizziopsis vriesii in captive coastal bearded dragons (*Pogona barbata*).  
348 *Australian Veterinary Journal*. **89**, 515–519 (2011).



- 349 21. R. A. Farrer, A. Martel, E. Verbrugghe, A. Abouelleil, R. Ducatelle, J. E. Longcore, T. Y. James,  
350 F. Pasmans, M. C. Fisher, C. A. Cuomo, Genomic innovations linked to infection strategies across emerging  
351 pathogenic chytrid fungi. *Nature Communications*. **8**, 14742 (2017).
- 352 22. K. A. Field, J. S. Johnson, T. M. Lilley, S. M. Reeder, E. J. Rogers, M. J. Behr, D. M. Reeder, The  
353 White-Nose Syndrome Transcriptome: Activation of Anti-fungal Host Responses in Wing Tissue of  
354 Hibernating Little Brown Myotis. *PLOS Pathogens*. **11**, e1005168 (2015).
- 355 23. E. L. Pannkuk, T. S. Risch, B. J. Savary, Isolation and Identification of an Extracellular Subtilisin-  
356 Like Serine Protease Secreted by the Bat Pathogen *Pseudogymnoascus destructans*. *PLOS ONE*. **10**,  
357 e0120508 (2015).
- 358 24. C. M. Davy, M. E. Donaldson, H. Bandouchova, A. M. Breit, N. A. S. Dorville, Y. A. Dzal, V.  
359 Kovacova, E. L. Kunkel, N. Martínková, K. J. O. Norquay, J. E. Paterson, J. Zukal, J. Pikula, C. K. R.  
360 Willis, C. J. Kyle, Transcriptional host–pathogen responses of *Pseudogymnoascus destructans* and three  
361 species of bats with white-nose syndrome. *Virulence*. **11**, 781–794 (2020).
- 362 25. Y.-S. Bahn, C. Xue, A. Idnurm, J. C. Rutherford, J. Heitman, M. E. Cardenas, Sensing the  
363 environment: lessons from fungi. *Nature Reviews Microbiology*. **5**, 57–69 (2007).
- 364 26. D. A. Martinez, B. G. Oliver, Y. Gräser, J. M. Goldberg, W. Li, N. M. Martinez-Rossi, M. Monod,  
365 E. Shelest, R. C. Barton, E. Birch, A. A. Brakhage, Z. Chen, S. J. Gurr, D. Heiman, J. Heitman, I. Kosti, A.  
366 Rossi, S. Saif, M. Samalova, C. W. Saunders, T. Shea, R. C. Summerbell, J. Xu, S. Young, Q. Zeng, B. W.  
367 Birren, C. A. Cuomo, T. C. White, Comparative genome analysis of trichophyton rubrum and related  
368 dermatophytes reveals candidate genes involved in infection. *mBio*. **3** (2012), doi:10.1128/mBio.00259-12.
- 369 27. R. de Jonge, H. P. van Esse, A. Kombrink, T. Shinya, Y. Desaki, R. Bours, S. van der Krol, N.  
370 Shibuya, M. H. A. J. Joosten, B. P. H. J. Thomma, Conserved fungal lysM effector Ecp6 prevents chitin-  
371 triggered immunity in plants. *Science*. **329**, 953–955 (2010).
- 372 28. J. Antonovics, Transmission dynamics: critical questions and challenges. *Philosophical*  
373 *Transactions of the Royal Society B: Biological Sciences*. **372**, 20160087 (2017).
- 374 29. S. Altizer, A. Dobson, P. Hosseini, P. Hudson, M. Pascual, P. Rohani, Seasonality and the dynamics  
375 of infectious diseases. *Ecol Lett*. **9**, 467–484 (2006).
- 376 30. G. F. Albery, L. Kirkpatrick, J. A. Firth, S. Bansal, Unifying spatial and social network analysis in  
377 disease ecology. *J Anim Ecol*. **90**, 45–61 (2021).
- 378 31. C. J. Briggs, R. A. Knapp, V. T. Vredenburg, Enzootic and epizootic dynamics of the chytrid fungal  
379 pathogen of amphibians. *PNAS*. **107**, 9695–9700 (2010).
- 380 32. C. A. Dobony, A. C. Hicks, K. E. Langwig, R. I. von Linden, J. C. Okoniewski, R. E. Rainbolt,  
381 Little Brown Myotis Persist Despite Exposure to White-Nose Syndrome. *Journal of Fish and Wildlife*  
382 *Management*. **2**, 190–195 (2011).
- 383 33. J. M. McKenzie, S. J. Price, G. M. Connette, S. J. Bonner, J. M. Lorch, Effects of snake fungal  
384 disease on short-term survival, behavior, and movement in free-ranging snakes. *Ecological Applications*.  
385 **31**, e02251 (2021).
- 386 34. K. E. Langwig, W. F. Frick, J. T. Bried, A. C. Hicks, T. H. Kunz, A. M. Kilpatrick, Sociality,  
387 density-dependence and microclimates determine the persistence of populations suffering from a novel  
388 fungal disease, white-nose syndrome. *Ecology Letters*. **15**, 1050–1057 (2012).
- 389 35. B. C. Scheele, L. F. Skerratt, L. F. Grogan, D. A. Hunter, N. Clemann, M. McFadden, D. Newell,  
390 C. J. Hoskin, G. R. Gillespie, G. W. Heard, L. Brannelly, A. A. Roberts, L. Berger, After the epidemic:  
391 Ongoing declines, stabilizations and recoveries in amphibians afflicted by chytridiomycosis. *Biological*  
392 *Conservation*. **206**, 37–46 (2017).
- 393 36. S. Benhaiem, L. Marescot, M. L. East, S. Kramer-Schadt, O. Gimenez, J.-D. Lebreton, H. Hofer,  
394 Slow recovery from a disease epidemic in the spotted hyena, a keystone social carnivore. *Commun Biol*. **1**,  
395 201 (2018).
- 396 37. K. Wells, R. K. Hamede, D. H. Kerlin, A. Storfer, P. A. Hohenlohe, M. E. Jones, H. I. McCallum,  
397 Infection of the fittest: devil facial tumour disease has greatest effect on individuals with highest  
398 reproductive output. *Ecol Lett*. **20**, 770–778 (2017).
- 399 38. C. M. Lind, J. M. Lorch, I. T. Moore, B. J. Vernasco, T. M. Farrell, Seasonal sex steroids indicate  
400 reproductive costs associated with snake fungal disease. *Journal of Zoology*. **307**, 104–110 (2019).

- 401 39. C. Kindermann, E. J. Narayan, J.-M. Hero, Does physiological response to disease incur cost to  
402 reproductive ecology in a sexually dichromatic amphibian species? *Comparative Biochemistry and*  
403 *Physiology Part A: Molecular & Integrative Physiology*. **203**, 220–226 (2017).
- 404 40. H. McCallum, N. Barlow, J. Hone, How should pathogen transmission be modelled? *Trends in*  
405 *Ecology & Evolution*. **16**, 295–300 (2001).
- 406 41. A. Gargas, M. T. Trest, M. Christensen, T. J. Volk, D. S. Blehert, *Geomyces destructans*  
407 sp. nov. associated with bat white-nose syndrome. *Mycotaxon*. **108**, 147–154 (2009).
- 408 42. L. Berger, R. Speare, P. Daszak, D. E. Green, A. A. Cunningham, C. L. Goggin, R. Slocombe, M.  
409 A. Ragan, A. D. Hyatt, K. R. McDonald, H. B. Hines, K. R. Lips, G. Marantelli, H. Parkes,  
410 Chytridiomycosis causes amphibian mortality associated with population declines in the rain forests of  
411 Australia and Central America. *PNAS*. **95**, 9031–9036 (1998).
- 412 43. M. B. Thompson, Estimate of the population structure of the eastern water dragon, *Physignathus*  
413 *lesueurii* (Reptilia : Agamidae), along riverside habitat. *Wildl. Res.* **20**, 613–619 (1993).
- 414 44. V. Ter-Hovhannisyan, A. Lomsadze, Y. O. Chernoff, M. Borodovsky, Gene prediction in novel  
415 fungal genomes using an ab initio algorithm with unsupervised training. *Genome Res.* **18**, 1979–1990  
416 (2008).
- 417 45. M. Stanke, O. Schöffmann, B. Morgenstern, S. Waack, Gene prediction in eukaryotes with a  
418 generalized hidden Markov model that uses hints from external sources. *BMC Bioinformatics*. **7**, 62 (2006).
- 419 46. I. Korf, Gene finding in novel genomes. *BMC Bioinformatics*. **5**, 59 (2004).
- 420 47. A. L. Delcher, K. A. Bratke, E. C. Powers, S. L. Salzberg, Identifying bacterial genes and  
421 endosymbiont DNA with Glimmer. *Bioinformatics*. **23**, 673–679 (2007).
- 422 48. B. J. Haas, S. L. Salzberg, W. Zhu, M. Pertea, J. E. Allen, J. Orvis, O. White, C. R. Buell, J. R.  
423 Wortman, Automated eukaryotic gene structure annotation using EVIDENCEModeler and the Program to  
424 Assemble Spliced Alignments. *Genome Biol.* **9**, R7 (2008).
- 425 49. F. A. Simão, R. M. Waterhouse, P. Ioannidis, E. V. Kriventseva, E. M. Zdobnov, BUSCO:  
426 assessing genome assembly and annotation completeness with single-copy orthologs. *Bioinformatics*. **31**,  
427 3210–3212 (2015).
- 428 50. R. D. Finn, A. Bateman, J. Clements, P. Coghill, R. Y. Eberhardt, S. R. Eddy, A. Heger, K.  
429 Hetherington, L. Holm, J. Mistry, E. L. L. Sonnhammer, J. Tate, M. Punta, Pfam: the protein families  
430 database. *Nucleic Acids Research*. **42**, D222–D230 (2014).
- 431 51. S. C. Potter, A. Luciani, S. R. Eddy, Y. Park, R. Lopez, R. D. Finn, HMMER web server: 2018  
432 update. *Nucleic Acids Research*. **46**, W200–W204 (2018).
- 433 52. R. C. Team, *R: A Language and Environment for Statistical Computing* (R Foundation for  
434 Statistical Computing, Vienna, Austria., 2021).
- 435 53. R. C. Edgar, MUSCLE: a multiple sequence alignment method with reduced time and space  
436 complexity. *BMC Bioinformatics*. **5**, 113 (2004).
- 437 54. M. N. Price, P. S. Dehal, A. P. Arkin, FastTree 2 – Approximately Maximum-Likelihood Trees for  
438 Large Alignments. *PLOS ONE*. **5**, e9490 (2010).
- 439 55. S. Martino, H. Rue, Implementing Approximate Bayesian Inference using Integrated Nested  
440 Laplace Approximation: a manual for the inla program. *Department of Mathematical Sciences, NTNU,*  
441 *Norway*. (2009).
- 442 56. F. Lindgren, H. Rue, J. Lindström, An explicit link between Gaussian fields and Gaussian Markov  
443 random fields: the stochastic partial differential equation approach. *Journal of the Royal Statistical Society:*  
444 *Series B (Statistical Methodology)*. **73**, 423–498 (2011).
- 445 57. F. Lindgren, H. Rue, Bayesian Spatial Modelling with R-INLA. *Journal of Statistical Software*. **63**,  
446 1–25 (2015).

**Table 1.** Details of the fungal species used in the comparative analysis.

| Species                               | Division        | Order             | Family              | Host            | Disease                               | GenBank Accession | Genome Size (MB) | Genome N50 (Kb) | Number predicted proteins |
|---------------------------------------|-----------------|-------------------|---------------------|-----------------|---------------------------------------|-------------------|------------------|-----------------|---------------------------|
| <i>Nannizzia barbatae</i>             | Ascomycota      | Onygenales        | Onygenaceae         | Reptiles        | Dermatomycoses                        | GCA_014964245.1   | 31.543           | 6,192           | 8,012*                    |
| <i>Ophidiomyces ophiodiicola</i>      | Ascomycota      | Onygenales        | Onygenaceae         | Snakes          | Ophidiomycosis (snake fungal disease) | GCA_002167195.1   | 21.865           | 1,499           | 6,983*                    |
| <i>Uncinocarpus reesii</i>            | Ascomycota      | Onygenales        | Onygenaceae         | -               | Non-pathogenic                        | GCF_000003515.1   | 22.349           | 5,232           | 7,760                     |
| <i>Coccidioides immitis</i>           | Ascomycota      | Onygenales        | Onygenaceae         | Humans          | Coccidioidomycosis (valley fever)     | GCA_004115165.2   | 27.474           | 3,797           | 7,815                     |
| <i>Chrysosporium queenslandicum</i>   | Ascomycota      | Onygenales        | Onygenaceae         | -               | Non-pathogenic                        | GCA_001430955.1   | 32.335           | 173             | 11564*                    |
| <i>Microsporum canis</i>              | Ascomycota      | Onygenales        | Arthrodermataceae   | Humans, animals | Dermatophytosis                       | GCF_000151145.1   | 23.263           | 2,919           | 8,765                     |
| <i>Trichophyton rubrum</i>            | Ascomycota      | Onygenales        | Arthrodermataceae   | Humans          | Dermatophytosis                       | GCF_000151425.1   | 22.530           | 2,156           | 8,706                     |
| <i>Trichophyton equinum</i>           | Ascomycota      | Onygenales        | Arthrodermataceae   | Humans, horses  | Dermatophytosis                       | GCA_000151175.1   | 24.158           | 397             | 8,676                     |
| <i>Nannizzia gypsea</i>               | Ascomycota      | Onygenales        | Arthrodermataceae   | Humans, animals | Dermatophytosis, onychomycosis        | GCF_000150975.2   | 23.272           | 3,227           | 8,921                     |
| <i>Paracoccidioides brasiliensis</i>  | Ascomycota      | Onygenales        | Ajellomycetaceae    | Humans          | Paracoccidioidomycosis                | GCF_000150735.1   | 29.952           | 2,149           | 8,390                     |
| <i>Blastomyces dermatitidis</i>       | Ascomycota      | Onygenales        | Ajellomycetaceae    | Humans, animals | Blastomycosis                         | GCA_000151595.1   | 73.633           | 400             | 11,443                    |
| <i>Pseudogymnoascus destructans</i>   | Ascomycota      | Incertae sedis    | Pseudeurotiaceae    | Bats            | White-nose syndrome                   | GCF_001641265.1   | 35.818           | 1,168           | 9,405                     |
| <i>Saccharomyces cerevisiae</i>       | Ascomycota      | Saccharomycetales | Saccharomycetaceae  | -               | Non-pathogenic                        | GCF_000146045.2   | 12.157           | 924             | 6,002                     |
| <i>Candida albicans</i>               | Ascomycota      | Saccharomycetales | Saccharomycetaceae  | Humans          | Candidiasis                           | GCF_000182965.3   | 14.282           | 2,231           | 6,030                     |
| <i>Aspergillus fumigatus</i>          | Ascomycota      | Eurotiales        | Trichocomaceae      | Humans          | Aspergillosis                         | GCA_000002655.1   | 29.384           | 3,948           | 9,630                     |
| <i>Cryptococcus neoformans</i>        | Basidiomycota   | Tremellales       | Tremellaceae        | Humans          | Cryptococcosis                        | GCF_000091045.1   | 19.051           | 4,438           | 6,863                     |
| <i>Batrachochytrium dendrobatidis</i> | Chytridiomycota | Rhizophydiales    | Batrachochytriaceae | Amphibians      | Chytridiomycosis                      | GCF_000203795.1   | 24.315           | 1,484           | 8,677                     |

\* Gene annotations produced in this study.



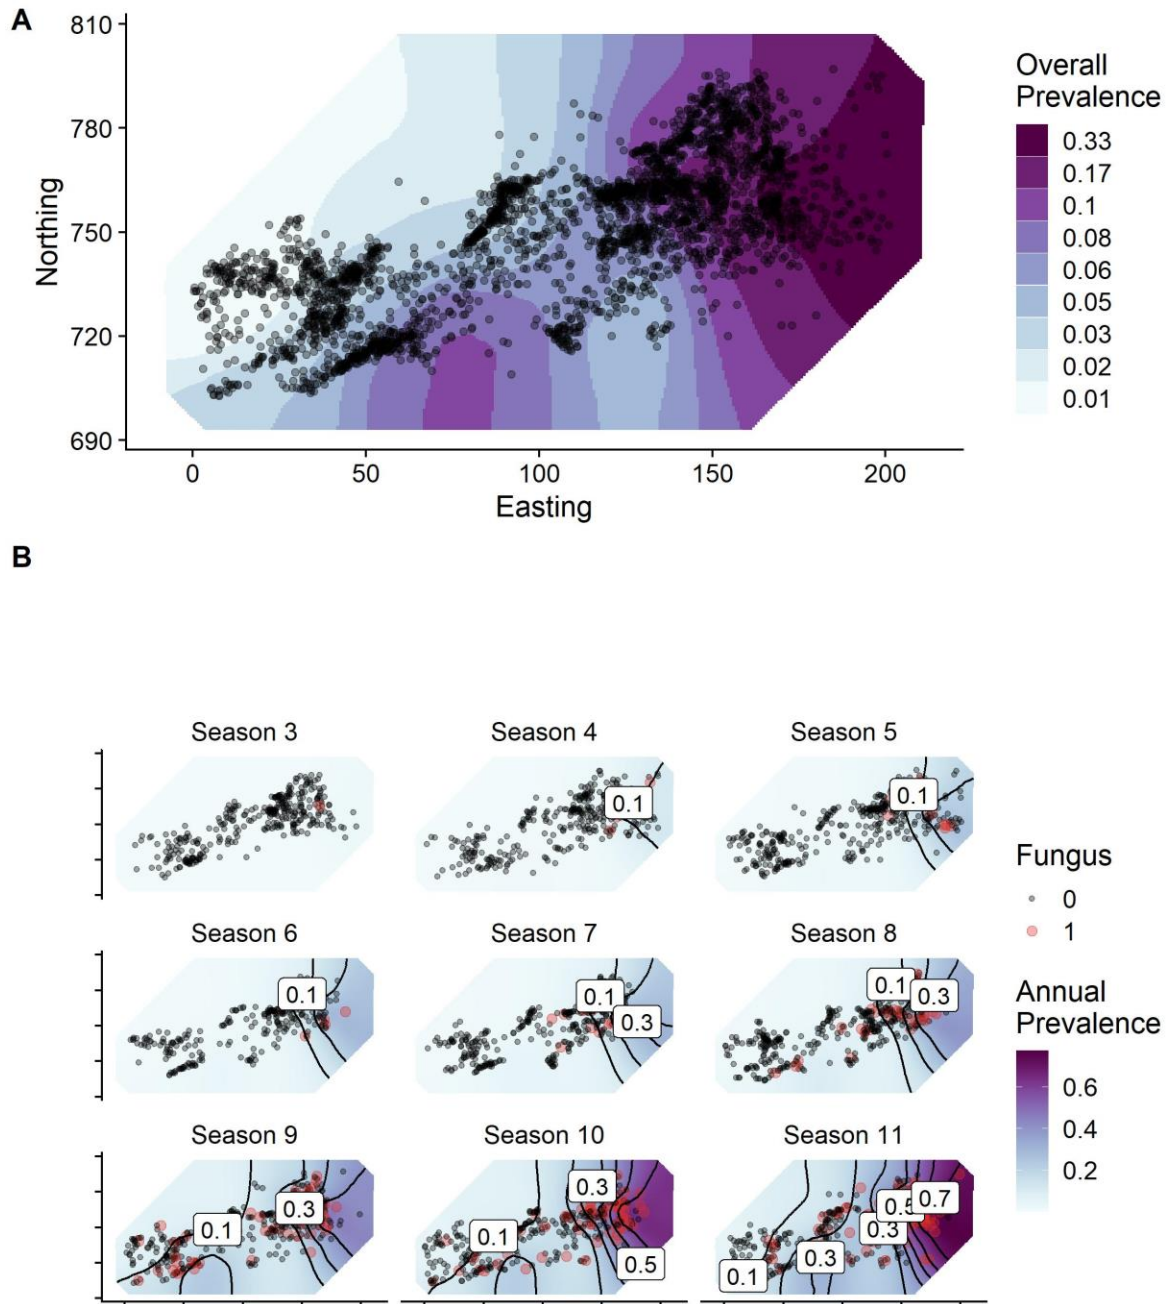

**Fig. 2. Spatial distribution and temporal spread of *N. barbatae* infection within the population.** These are represented as the spatial distribution of the spatial random effect from the Spatial model (A) and the annually stratified Spatiotemporal model (B), respectively. The spatial effects were estimated using a stochastic partial differentiation equation (SPDE) in an integrated nested Laplace approximation (INLA) model. Adding these SPDE components substantially

improved model fit. In (A), points represent individuals' average annual locations. The axes in (B) are identical to those in (A), with the labels removed for plotting clarity. In (A), the spatial effect is categorized into eight quantiles to facilitate visualization over a range of prevalence values.



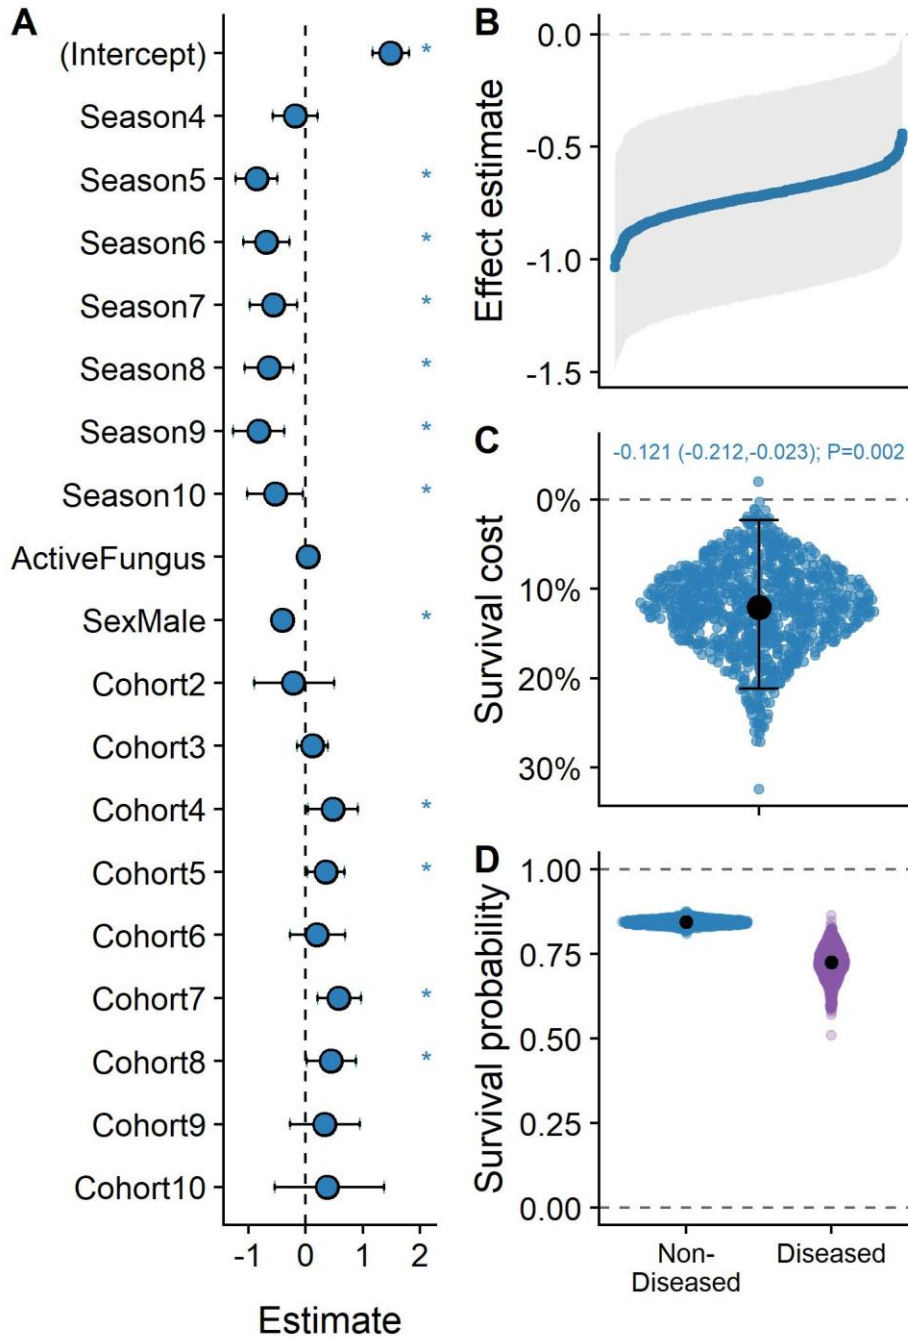

**Fig.3. Survival effects of *N. barbatae* infection in the population.** Survival effects of the disease are estimated using a full-population model (A), and an approach combining model uncertainty and subsampling regime uncertainty (B, C, D). The second approach provided estimates of survival effects across all subsamples (B) and survival costs (C) and probabilities (D) of diseased

vs. non-diseased individuals. The large black points represent means across all 1000 replicates. The text at the top of panel C displays the effect estimate for the survival cost across all models, with 95% credibility intervals in brackets and the P value. The error bars represent the 95% credibility intervals.
